# Supplementary material for: Tumor Cell-Derived Exosomal circ-PRKCI Promotes Proliferation of Renal Cell Carcinoma via Regulating miR-545-3p/CCND1 Axis
Source: MDPI journal article supplement (doi:10.3390/cancers15010123), 2022-12-25

Figure 1E

Annexin

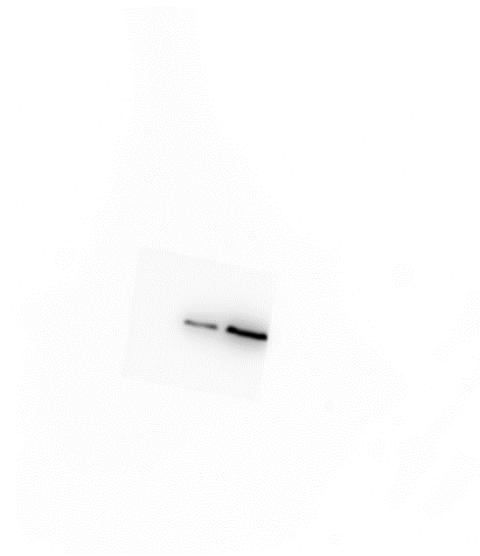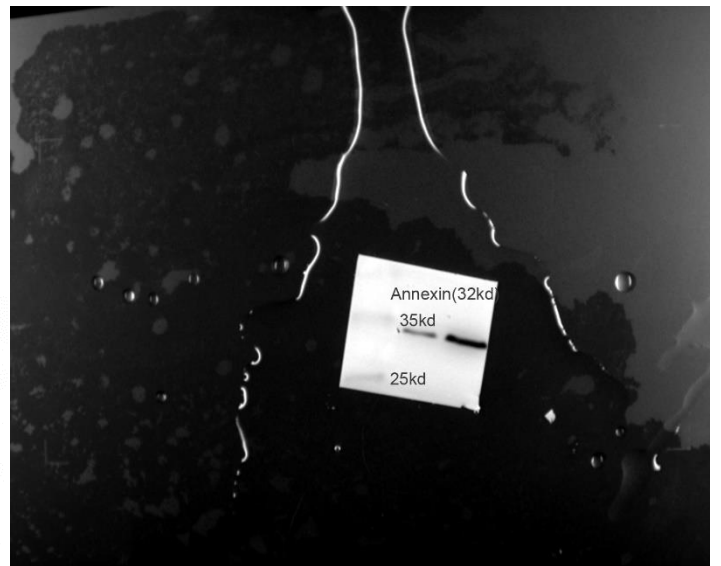

CD54

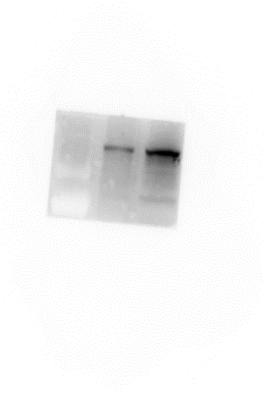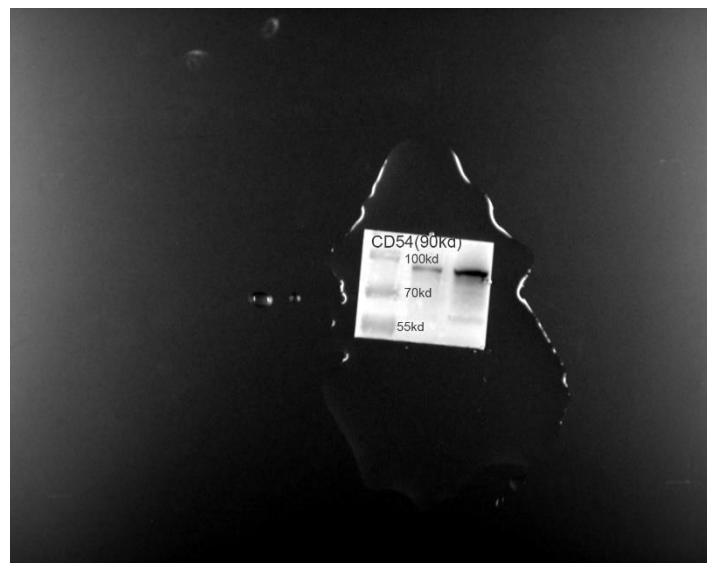

CD63

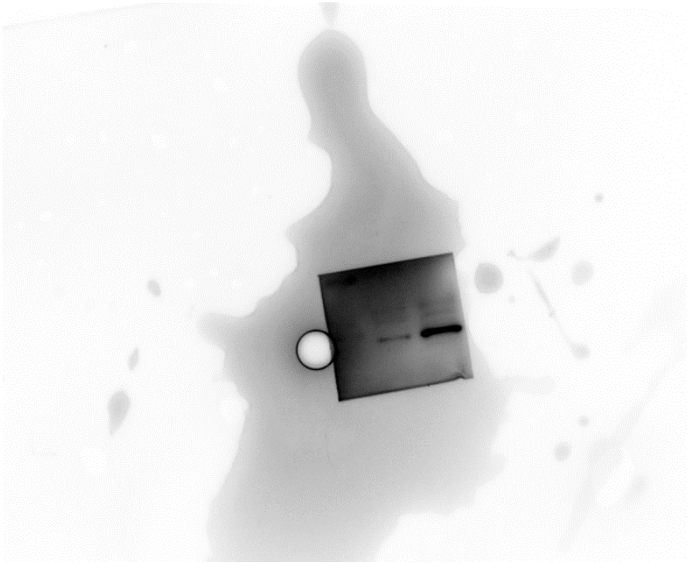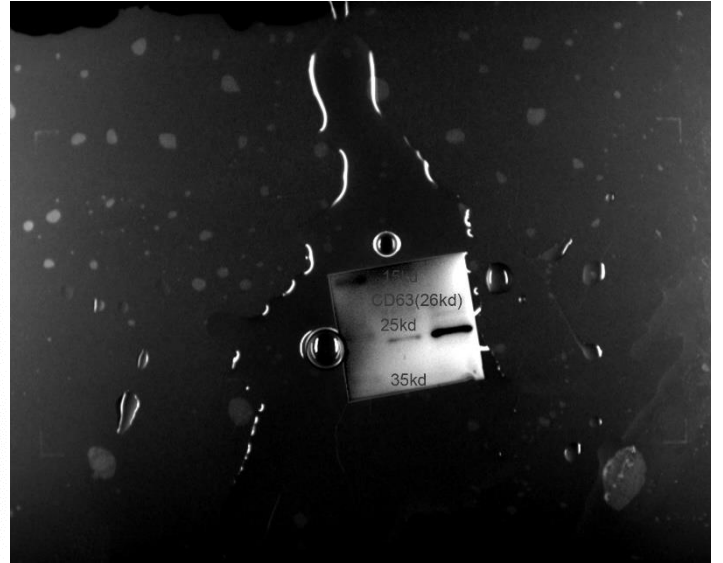

GM130

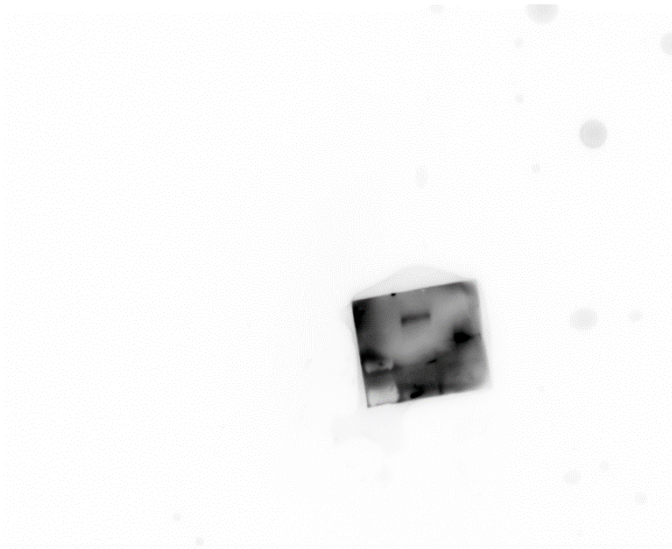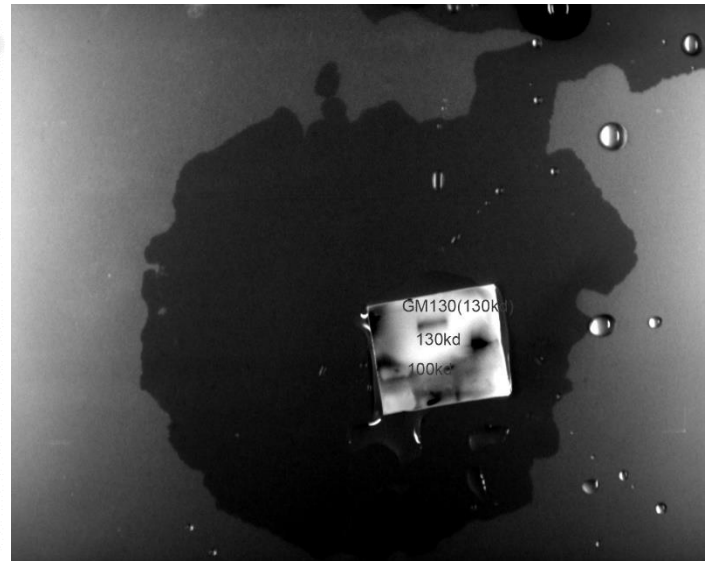

Figure 2D

Annexin

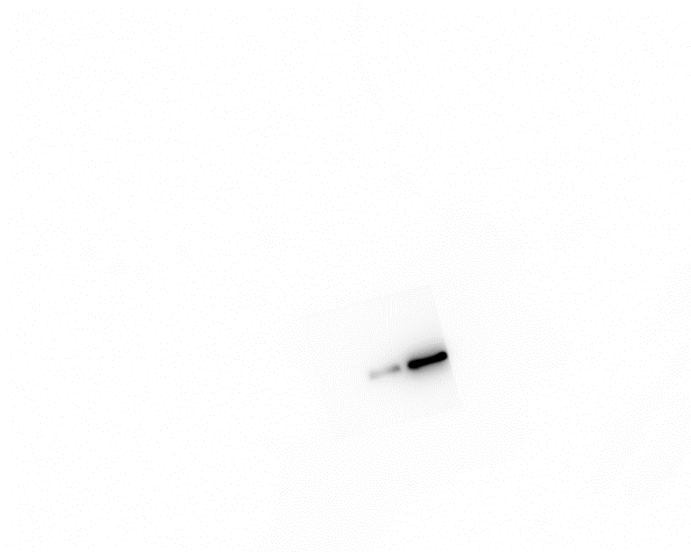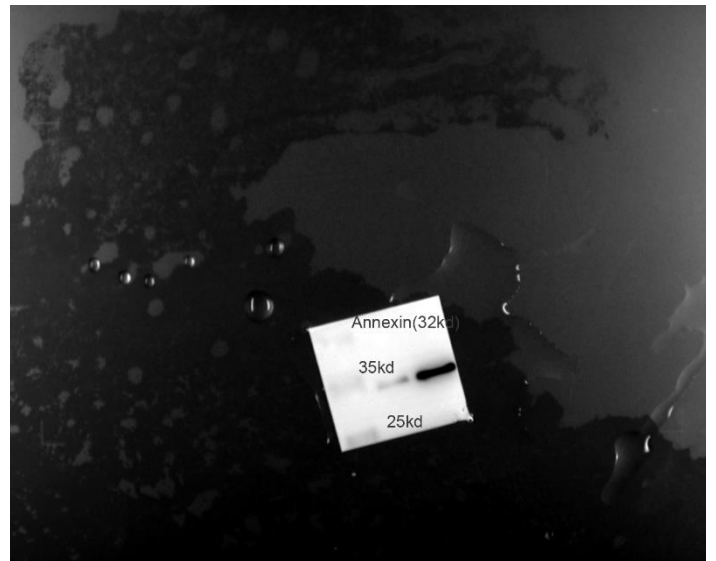

CD54

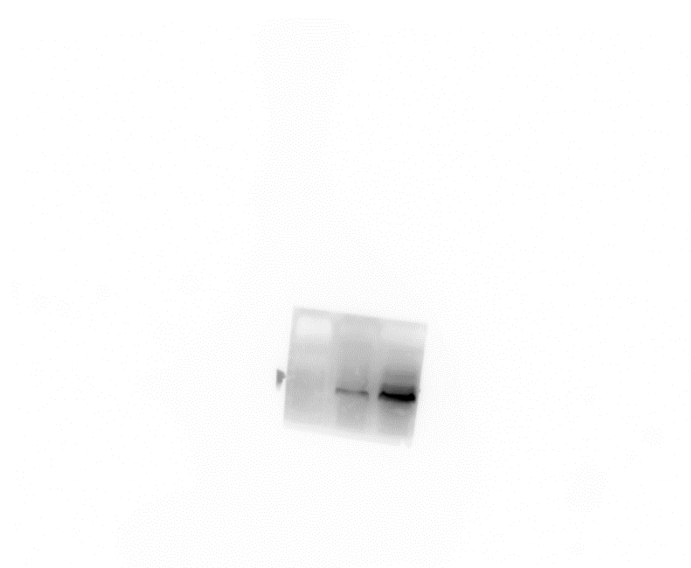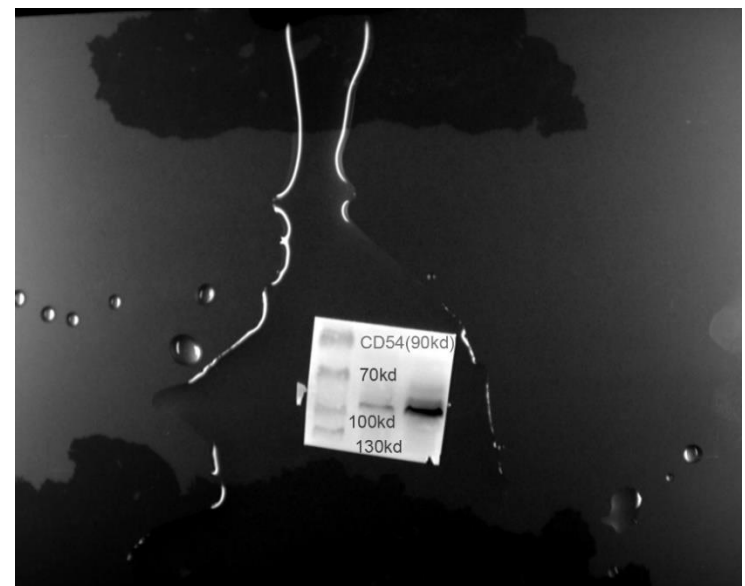

CD63

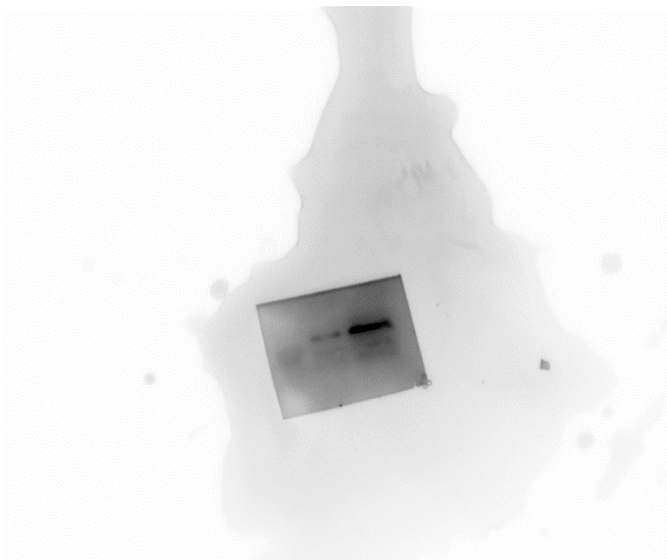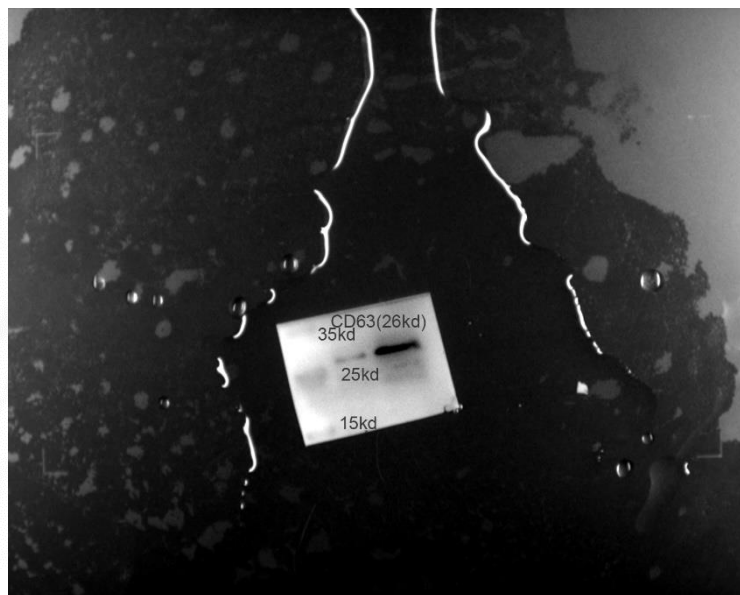

GM130

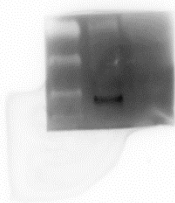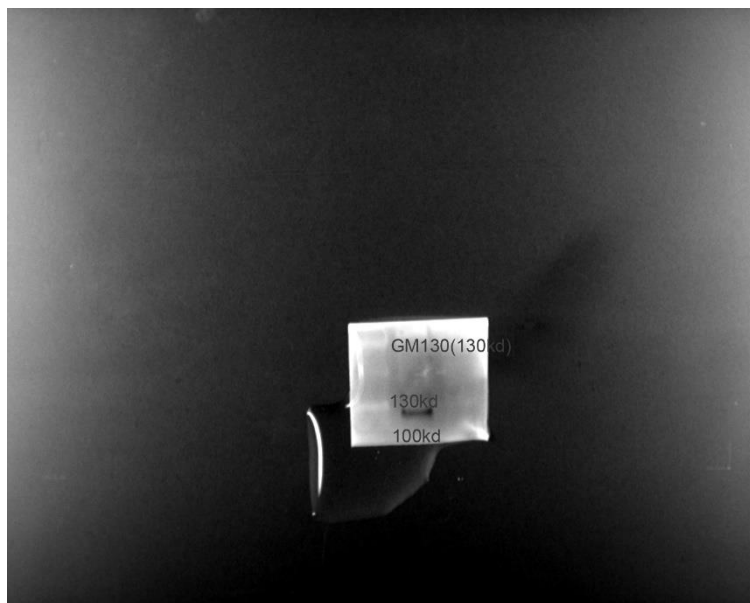

Figure 3F

786-O Beta Actin

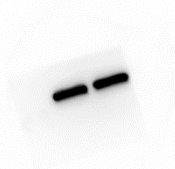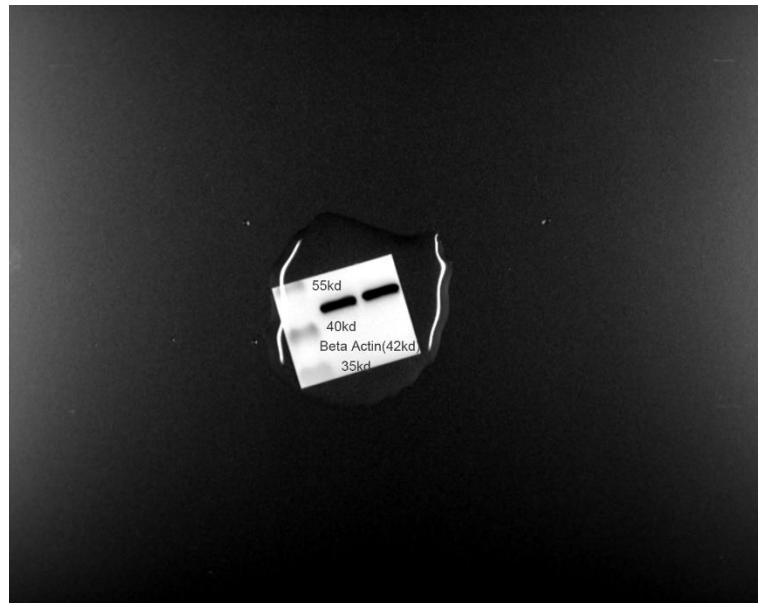

786-O BCL-2

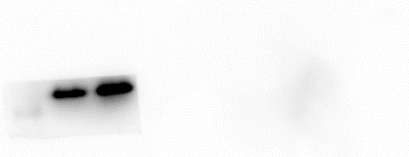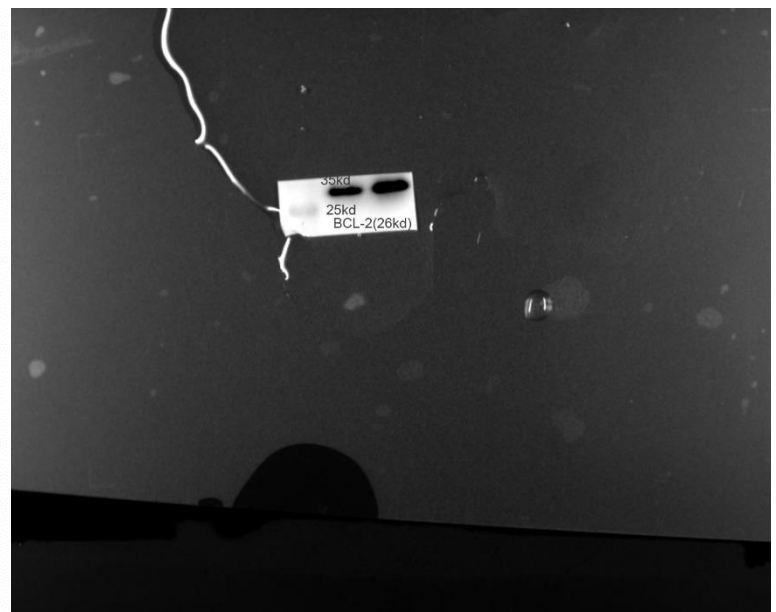



786-O Cleaved-caspase3

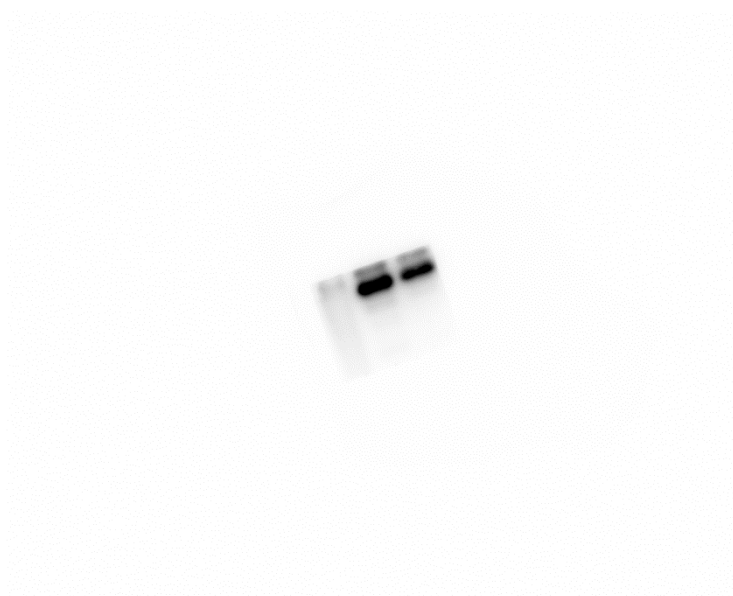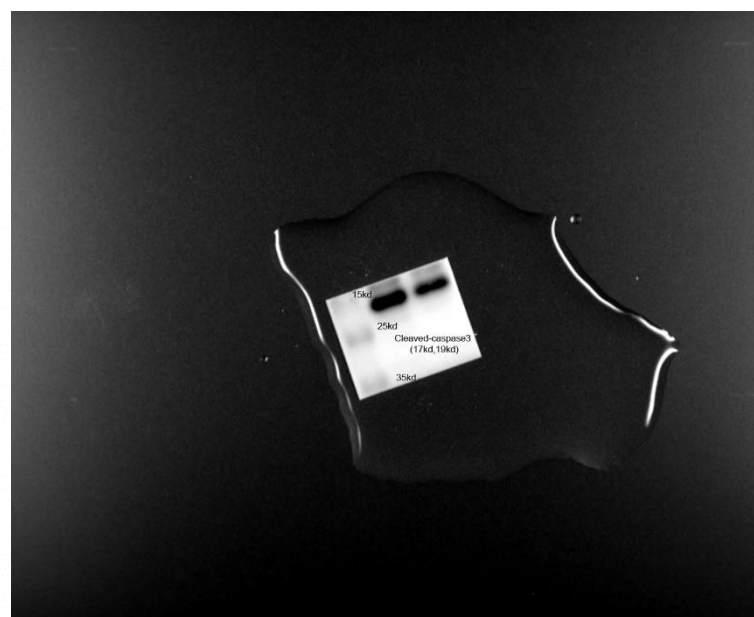

786-O Cleaved-caspase9

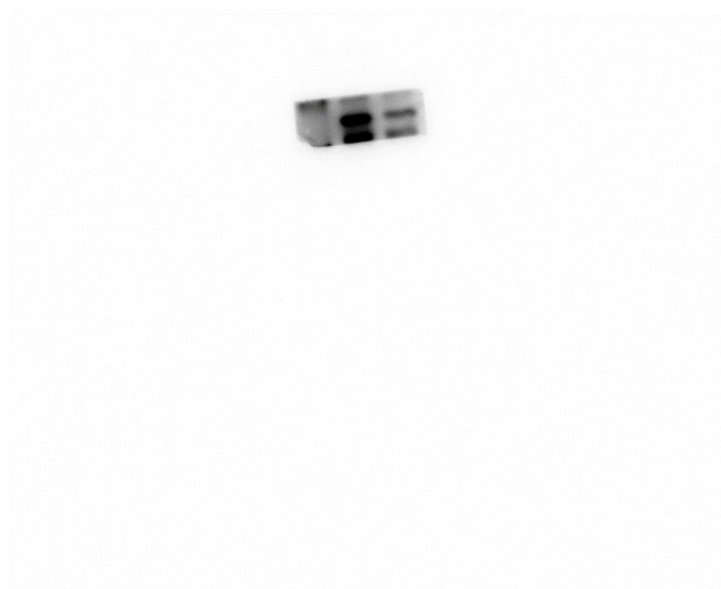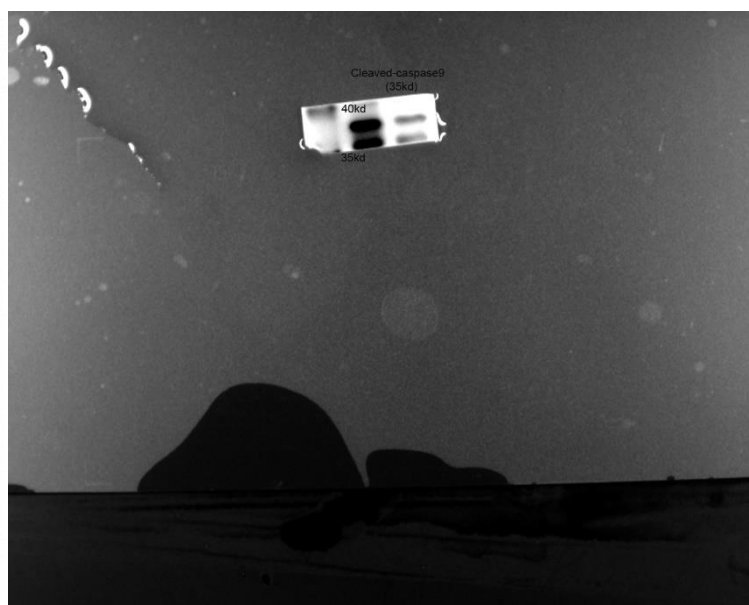

ACHN Beta Actin

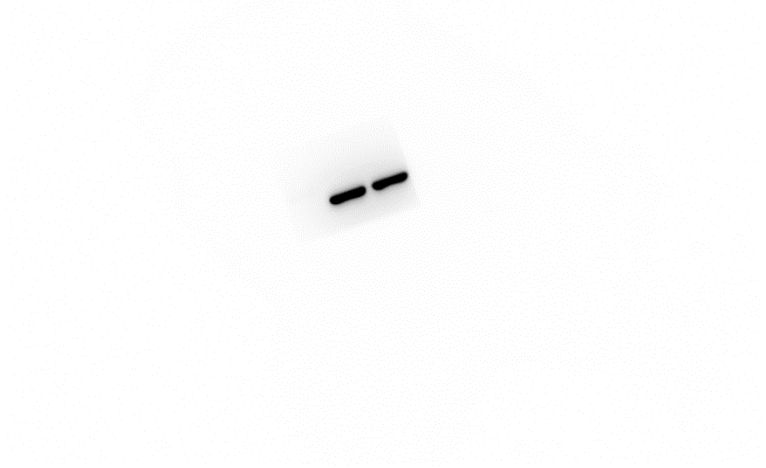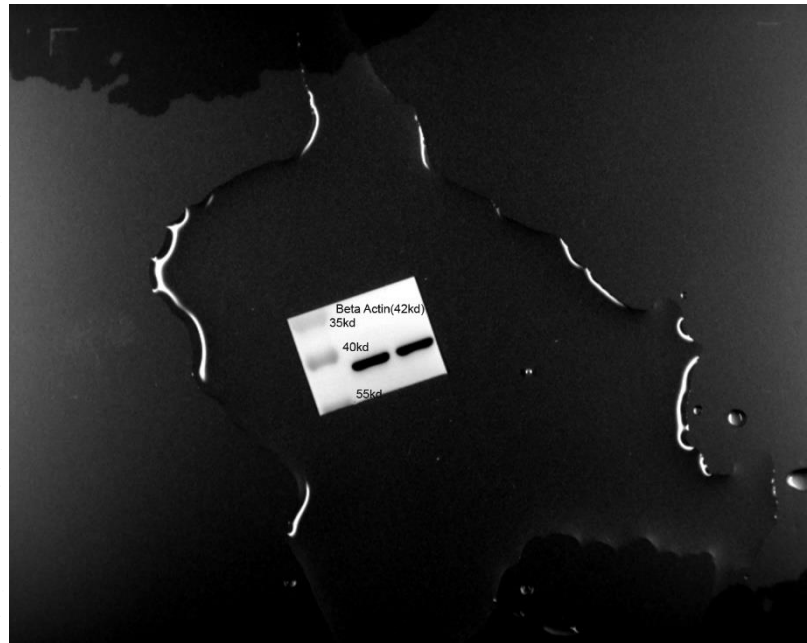

ACHN BCL-2

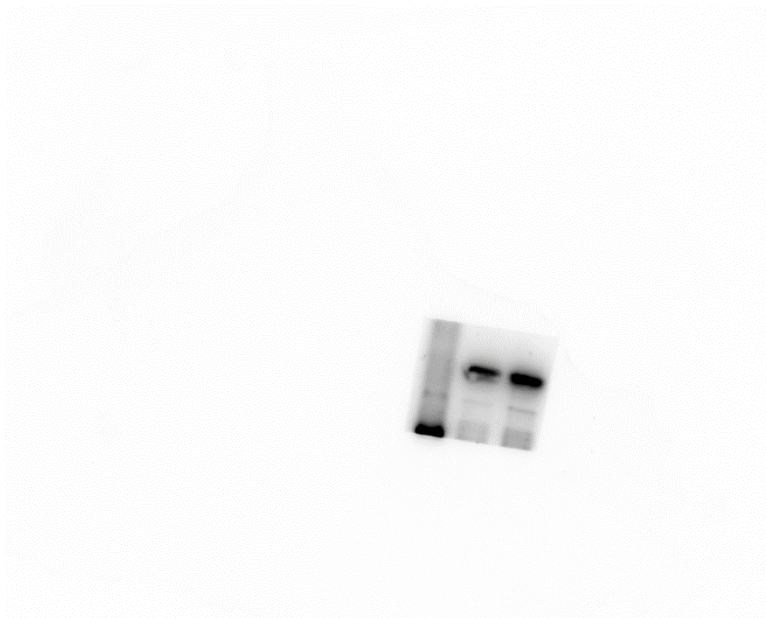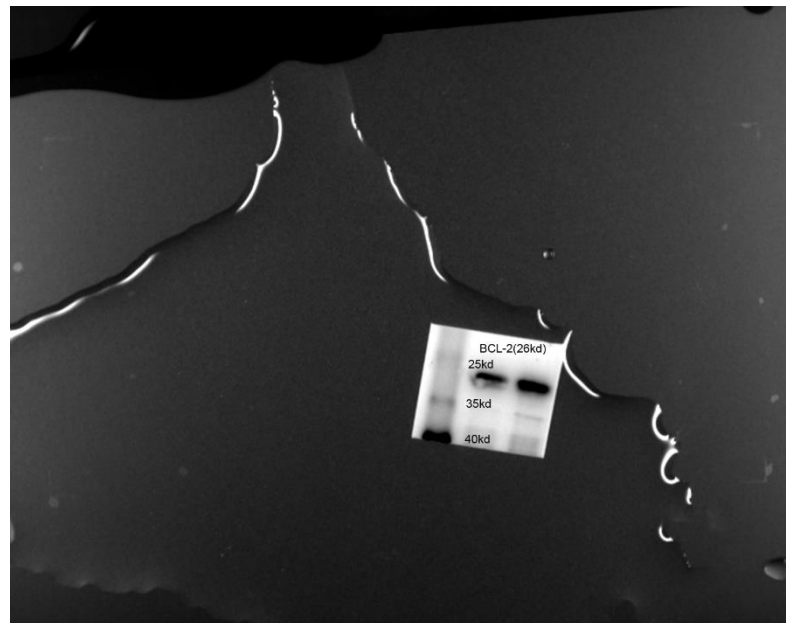

ACHN Cleaved-caspase3

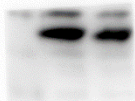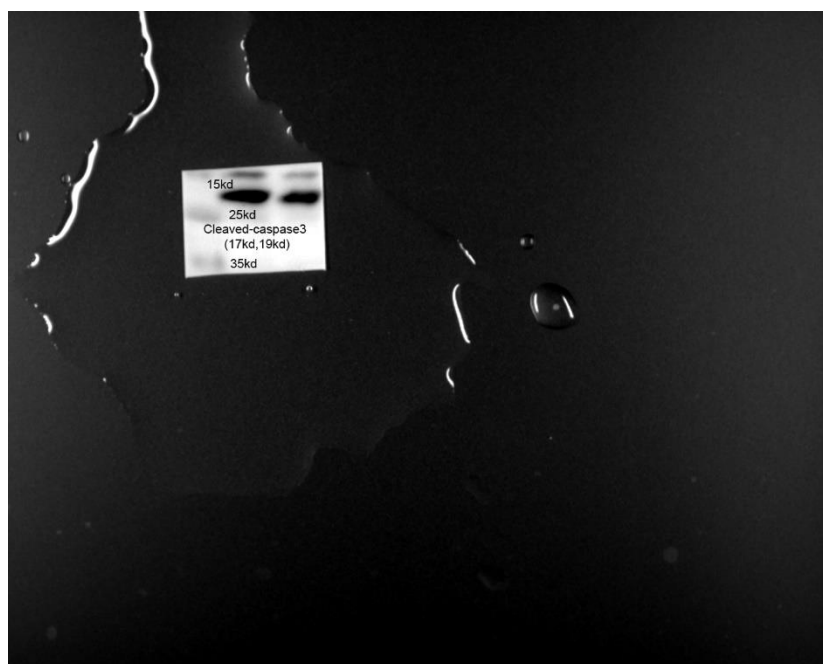

ACHN Cleaved-caspase9

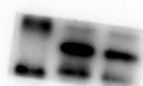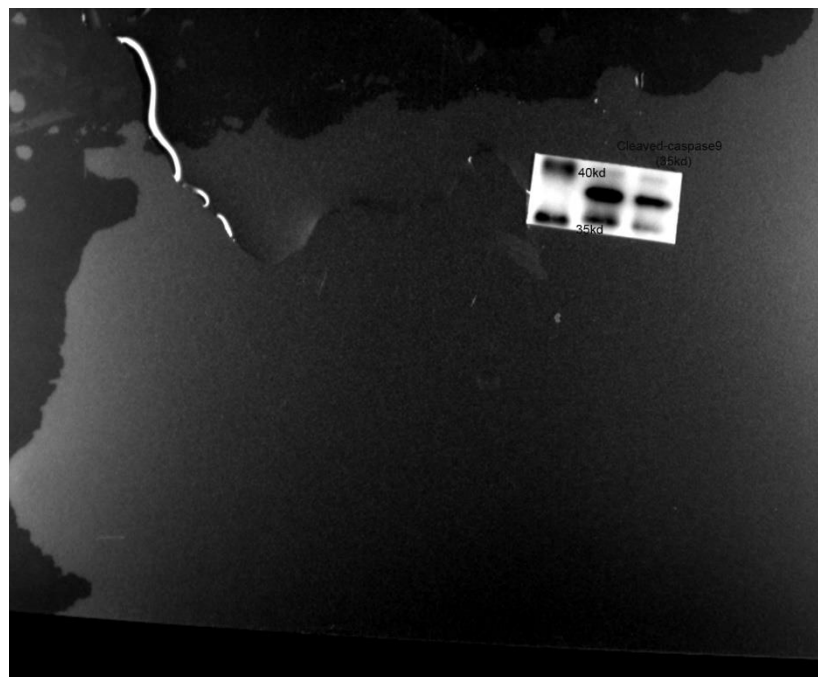



Figure 3G

786-O E-cadherin

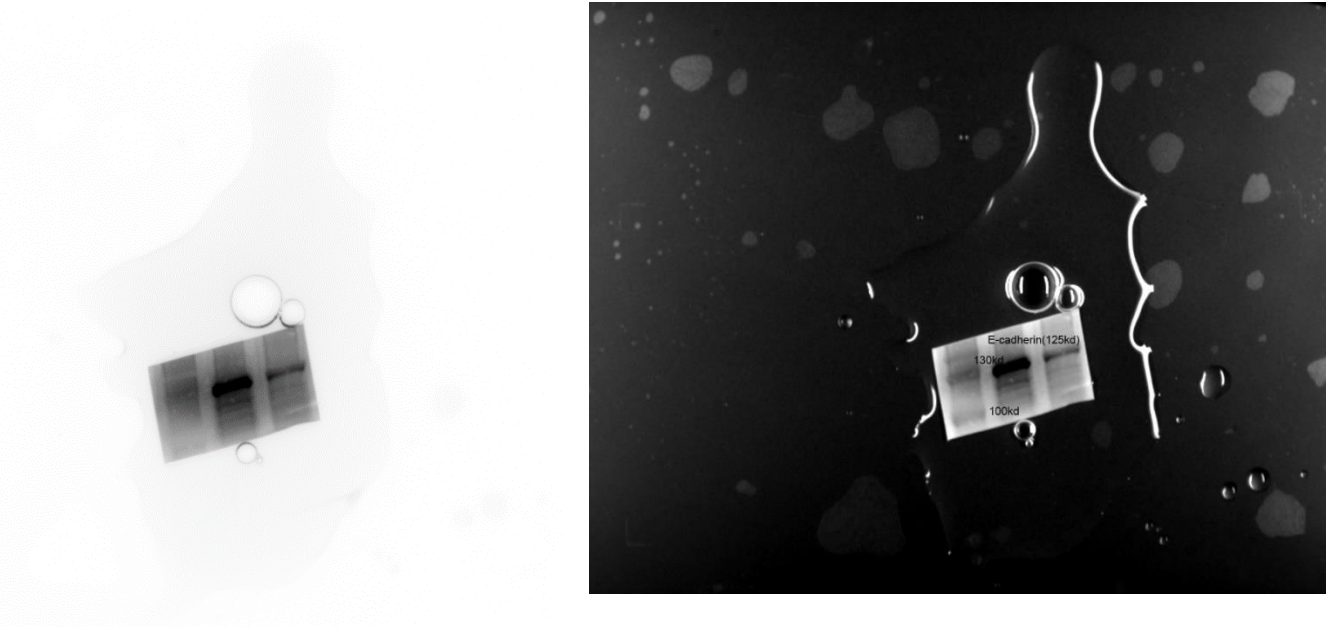

786-O GADPH

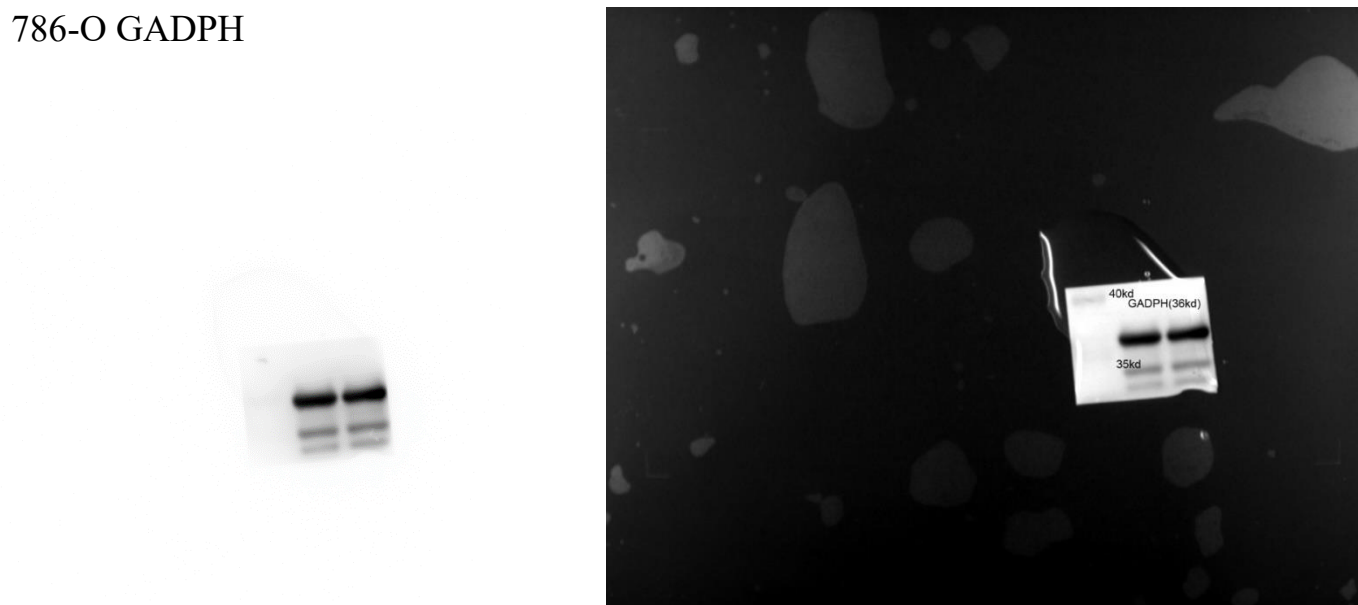

786-O N-cadherin

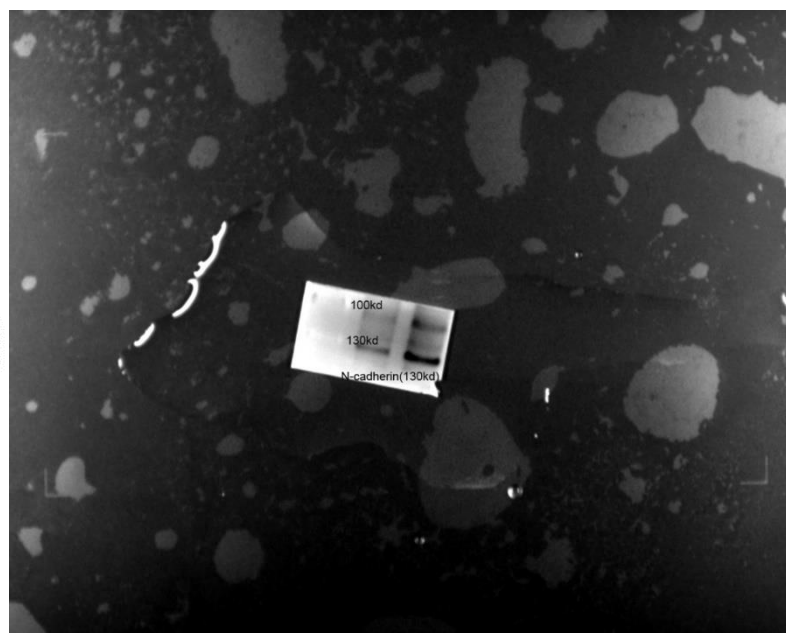

786-O Vimentin

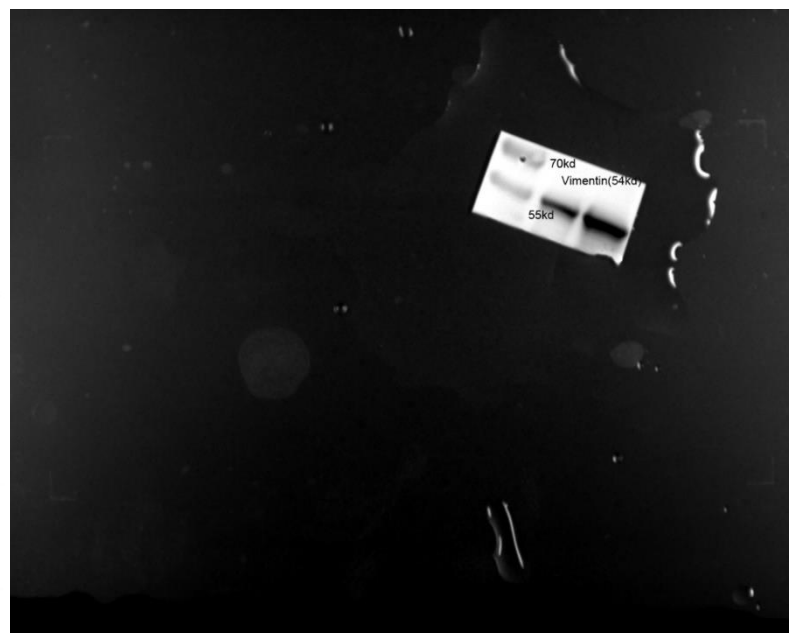

ACHN E-cadherin

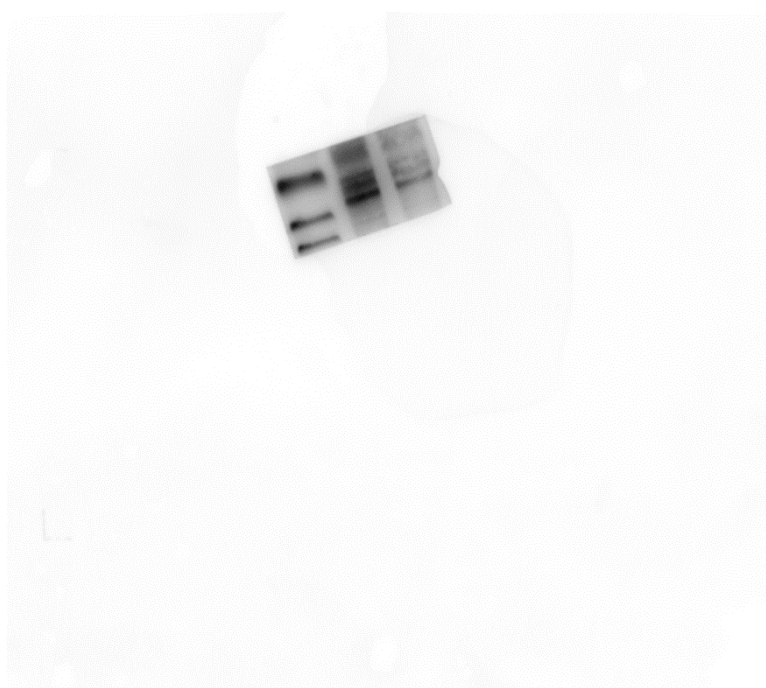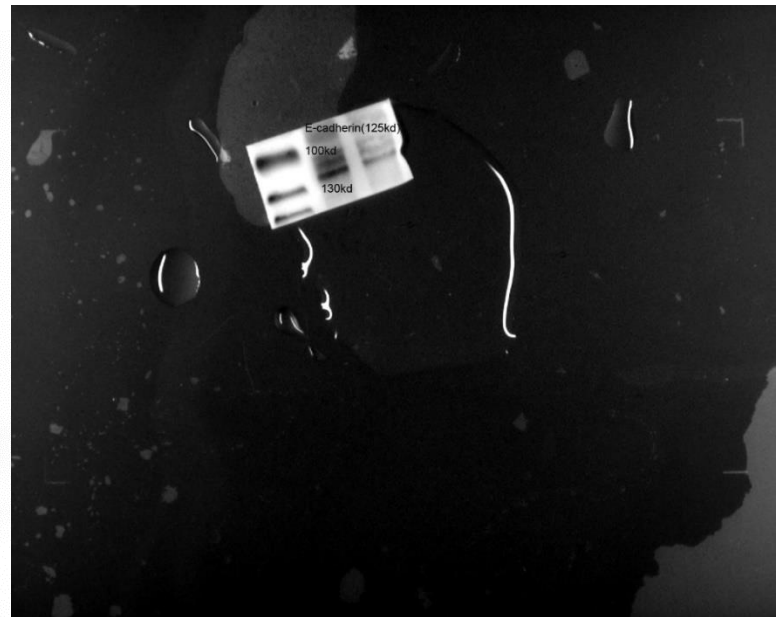

ACHN GADPH

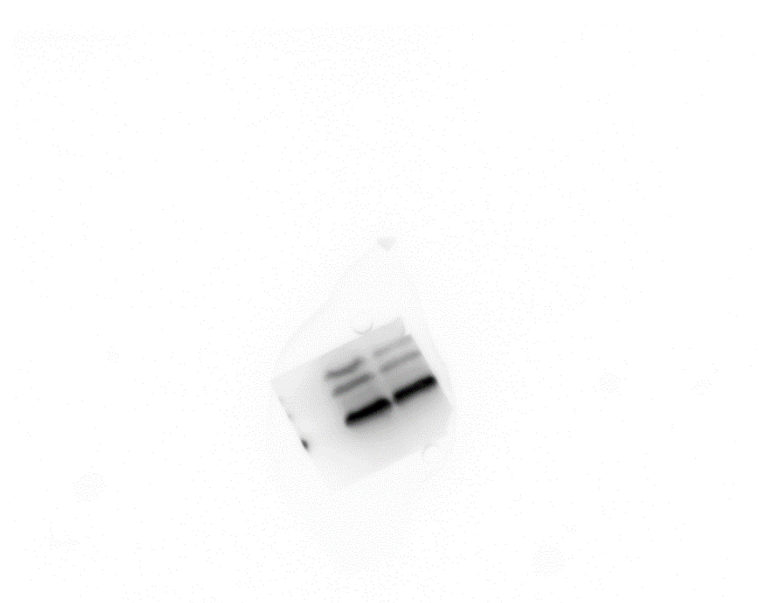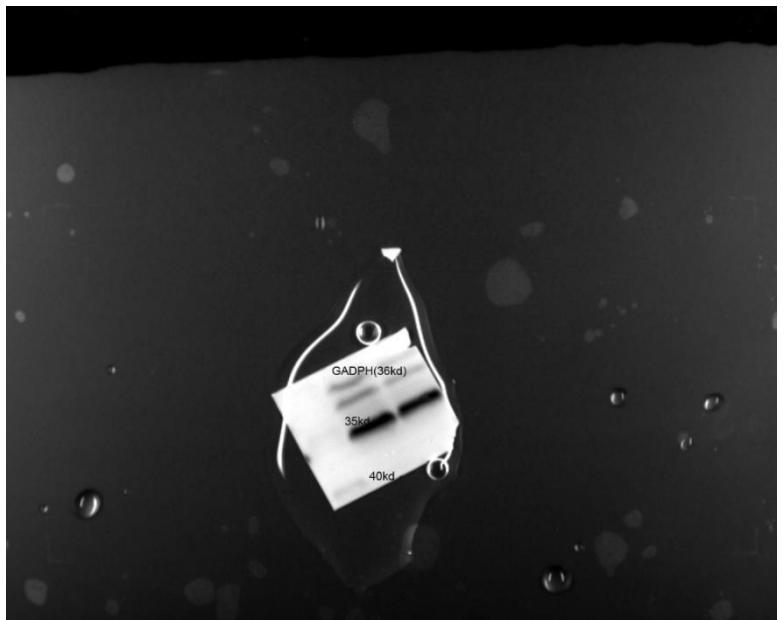

ACHN N-cadherin

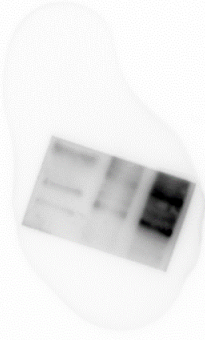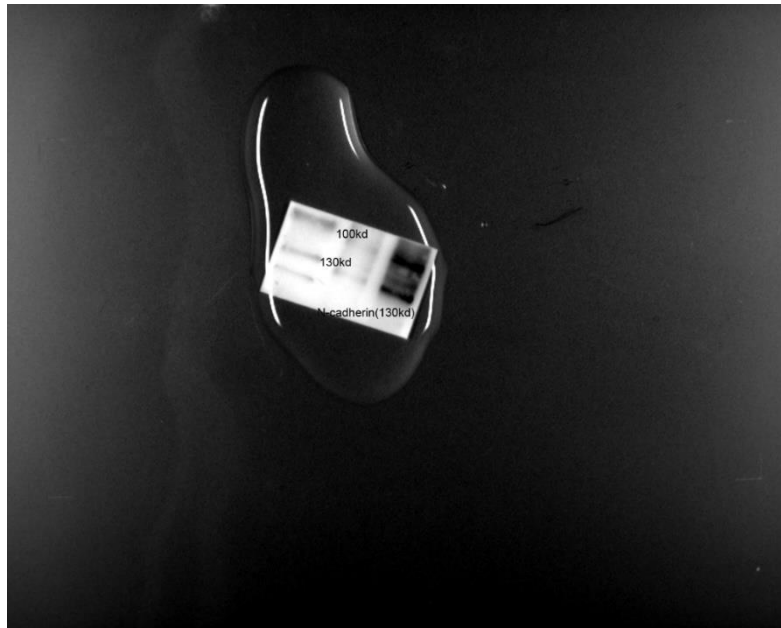

ACHN Vimentin

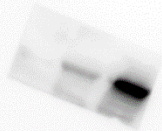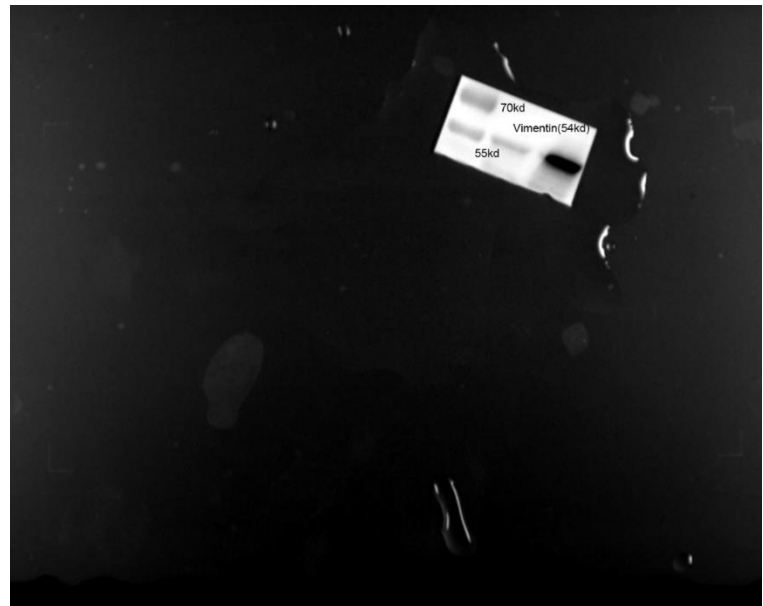



Figure 5F

786-O

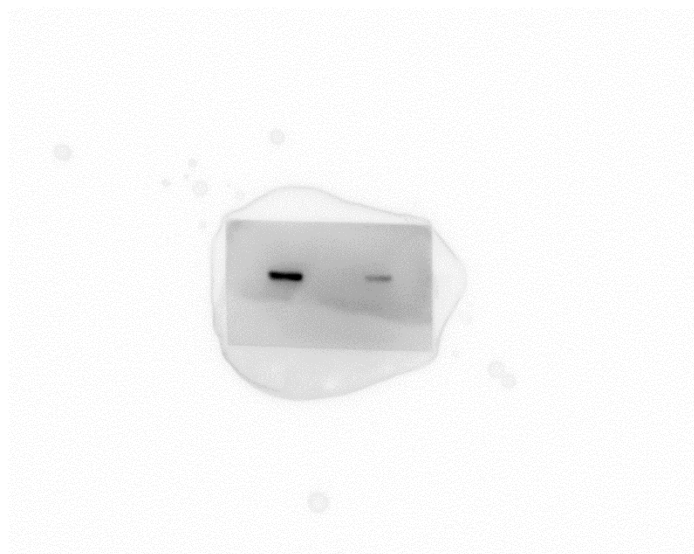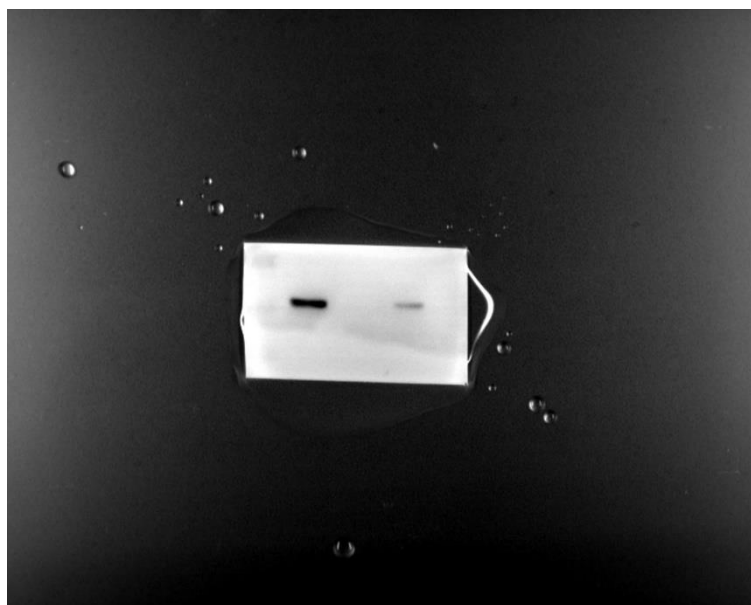

ACHN

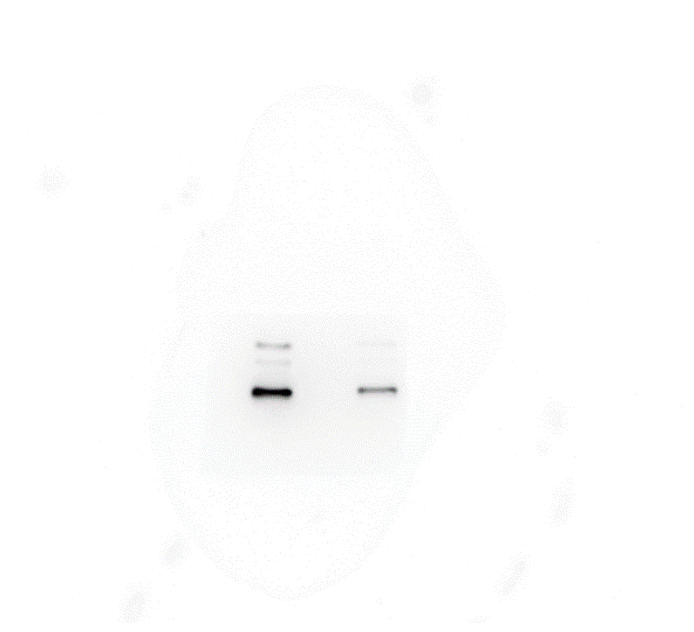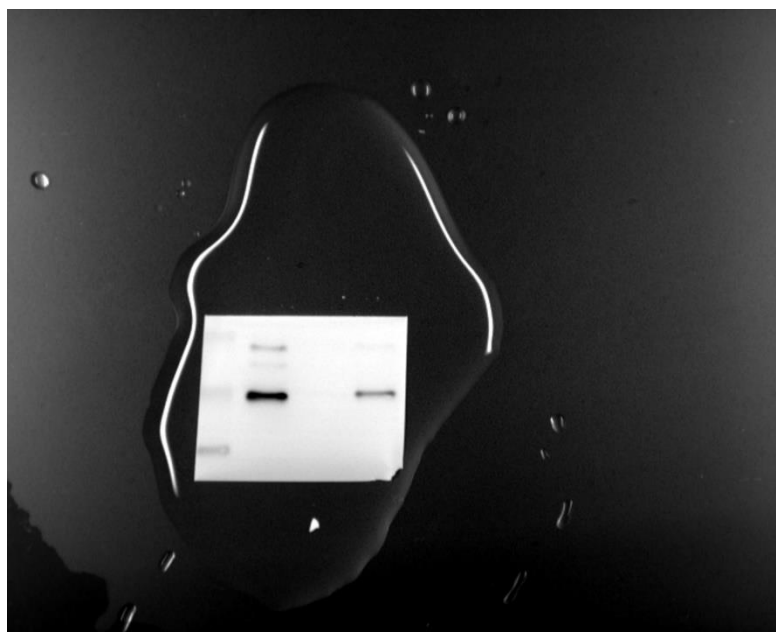

Figure 6G

786-O CCND1

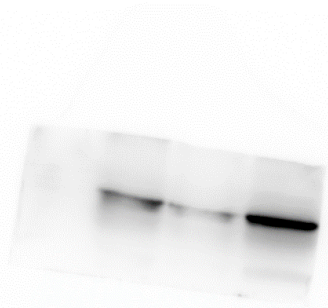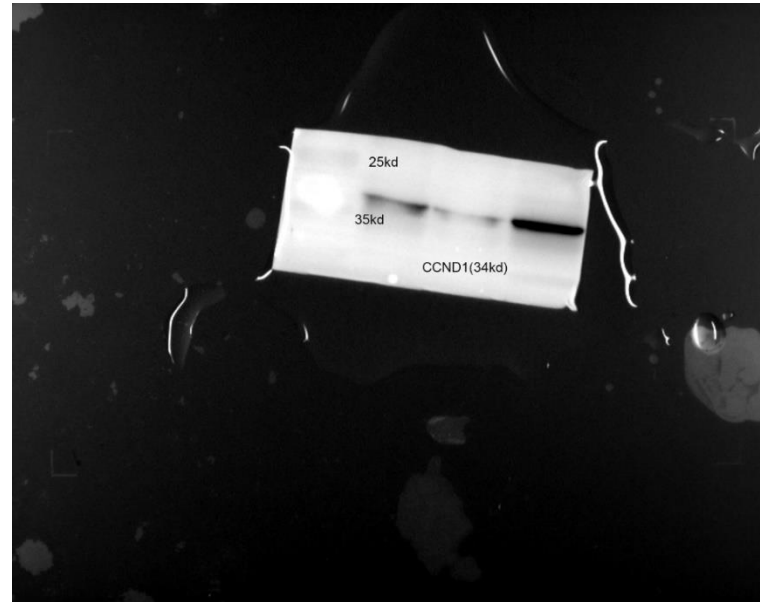

786-O TUBULIN

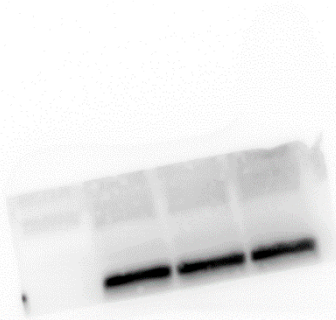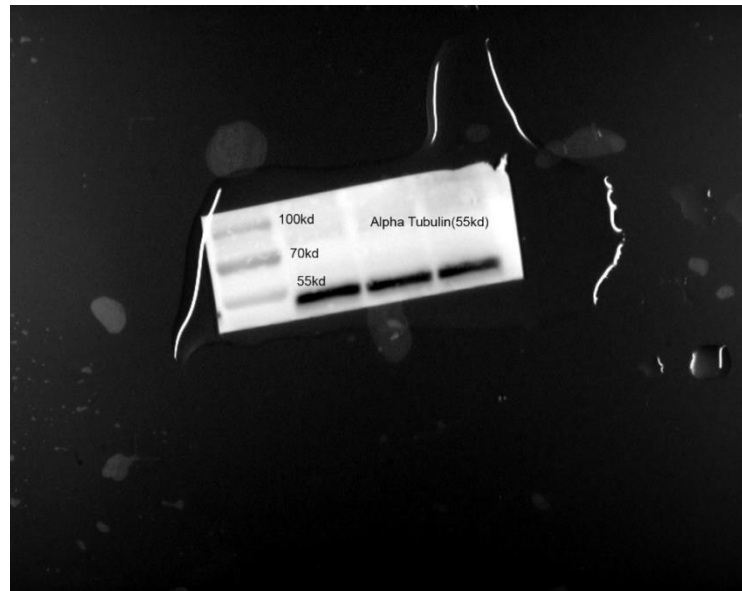

ACHN CCND1

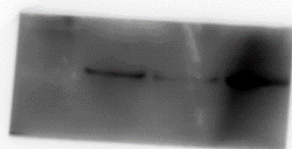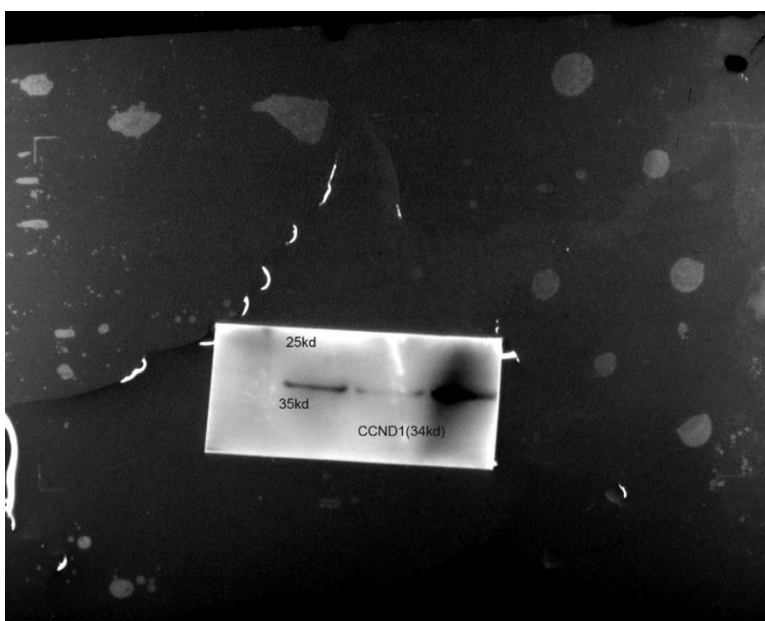

ACHN TUBLIN

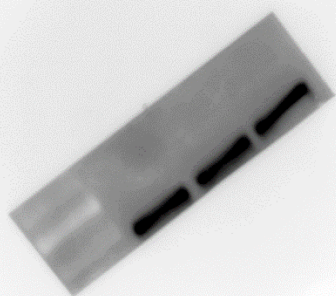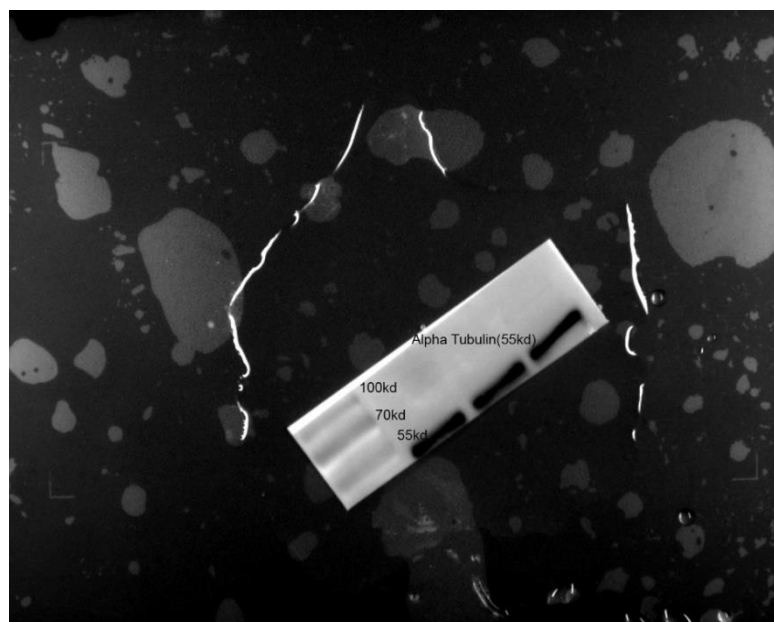



Figure 6I

786-O CCND1

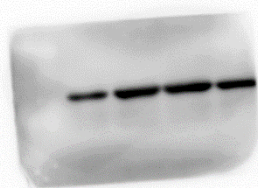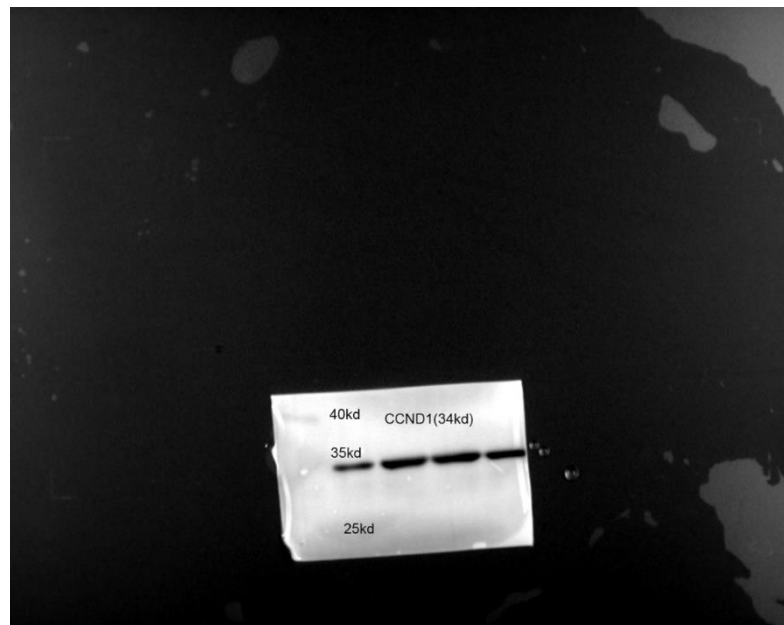

786-O TUBLIN

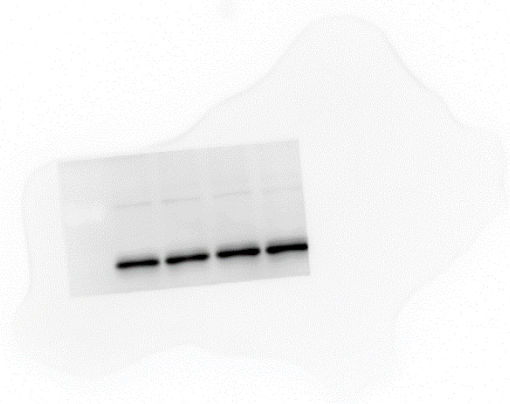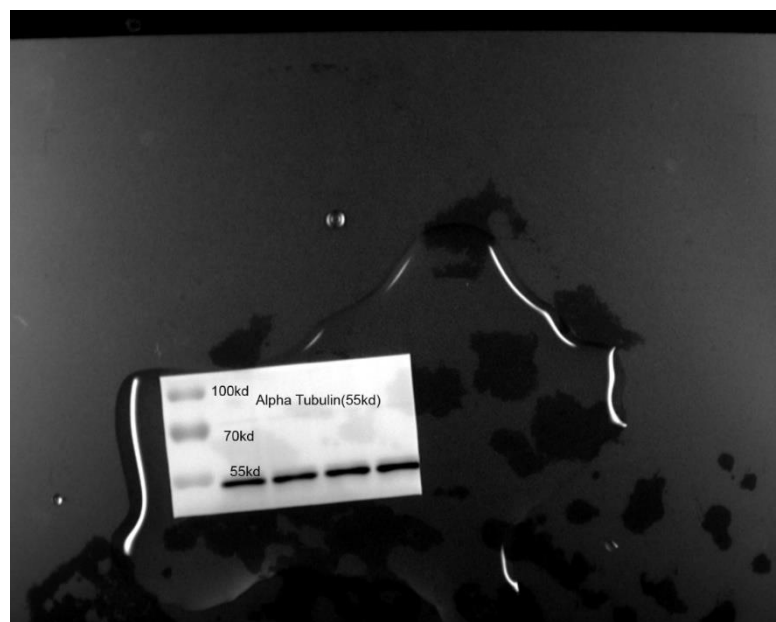



## ACHN CCND1

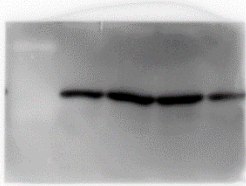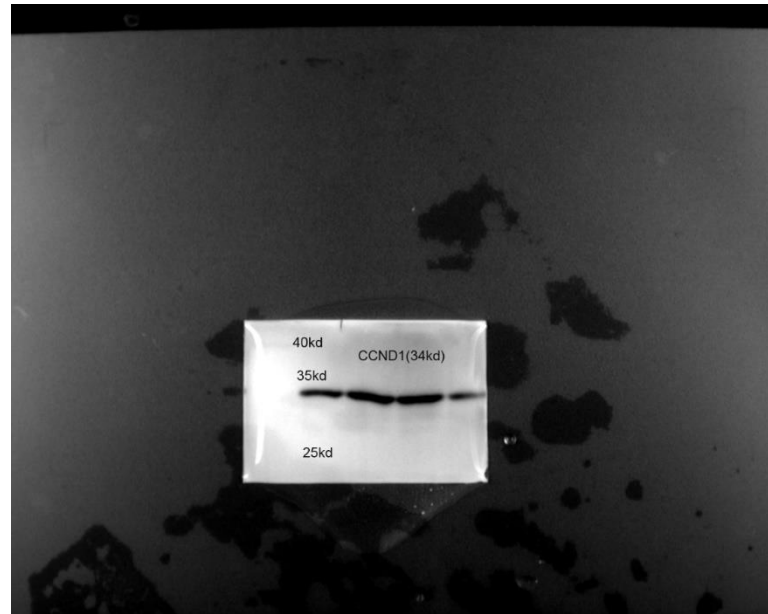

## ACHN TUBLIN

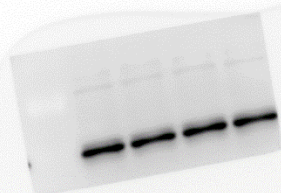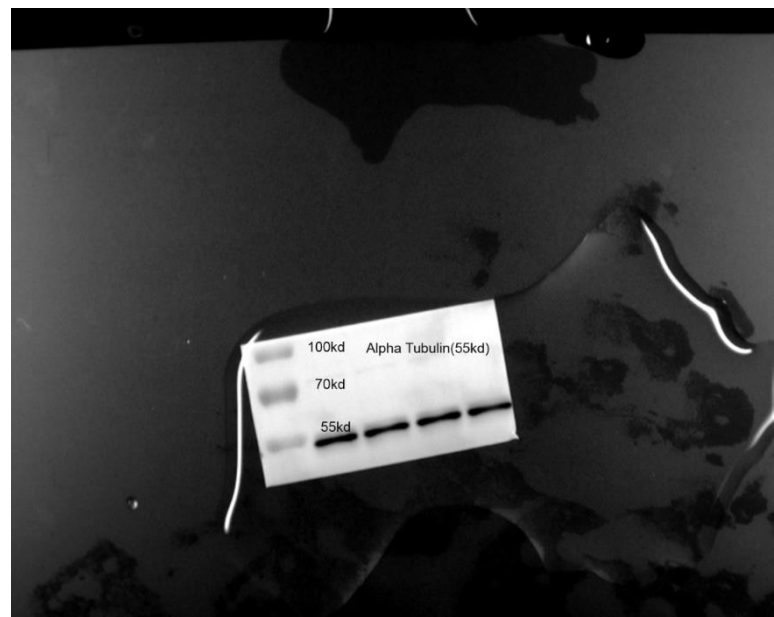

Supplement: s1 [file s1]
