# Supplementary material for: Tumor Cell-Derived Exosomal circ-PRKCI Promotes Proliferation of Renal Cell Carcinoma via Regulating miR-545-3p/CCND1 Axis
Source: MDPI journal article supplement (doi:10.3390/cancers15010123), 2022-12-25
Supplement: s1 [file s1]

**Supplementary Table S1. The primer sequences of genes**

| Gene name  | Forward (5' to 3') | Reverse (5' to 3')             |
|------------|--------------------|--------------------------------|
| circ-PRKCI | ACGATGACATTGTG     | ATGATATCCCCGCGGTAGTAG          |
|            | AGGAAGATTG         |                                |
| miR-545-3p | TCGGCAGGTCAGCA     | GTCGTATCCAGTGCAGGGTCCGAGGTATTC |
|            | AACATTTA           | GCACTGGATACGACGCACAC           |
| CCND1      | ATCAAGTGTGACCC     | ATCAAGTGTGACCCGGACTG           |
|            | GGACTG             |                                |
| GADPH      | CCAGGTGGTCTCCT     | GCTGTAGCCAAATCGTTGT            |
|            | CTGA               |                                |
| U6         | CTCGCTTCGGCAGC     | AACGCTTCACGAATTTGCGT           |
|            | ACA                |                                |

**Supplementary Table S2. Information of antibodies**

| <b>Antibody name</b> | <b>Dilution</b> | <b>Brand</b>                 | <b>Catalog number</b> |
|----------------------|-----------------|------------------------------|-----------------------|
| GM130                | 1:1000          | CST, Shanghai, China         | #74220                |
| CD54                 | 1:1000          | CST, Shanghai, China         | #74220                |
| Annexin              | 1:1000          | CST, Shanghai, China         | #74220                |
| CD63                 | 1:1000          | CST, Shanghai, China         | #74220                |
| BCL-2                | 1:5000          | Proteintech, Shanghai, China | 12789-1-AP            |
| Cleaved-caspase3     | 1:500           | Proteintech, Shanghai, China | 19677-1-AP            |
| Cleaved-caspase9     | 1:500           | Proteintech, Shanghai, China | 10380-1-AP            |
| Beta Actin           | 1:10000         | Proteintech, Shanghai, China | 20536-1-AP            |
| E-cadherin           | 1:5000          | Proteintech, Shanghai, China | 20874-1-AP            |
| N-cadherin           | 1:2000          | Proteintech, Shanghai, China | 22018-1-AP            |
| Vimentin             | 1:5000          | Proteintech, Shanghai, China | 10366-1-AP            |
| GADPH                | 1:20000         | Proteintech, Shanghai, China | 10494-1-AP            |
| CCND1                | 1:5000          | Proteintech, Shanghai, China | 60186-1-Ig            |
| Alpha Tubulin        | 1:10000         | Proteintech, Shanghai, China | 11224-1-AP            |

**Supplementary Table S3. Thirteen intersective genes between four databases**

| <b>Gene</b>  |
|--------------|
| ARIH1        |
| ZCCHC3       |
| RBPJ         |
| PLAG1        |
| PEX5L        |
| AGO4         |
| FAM13A       |
| TUBB         |
| SLC16A9      |
| DISC1        |
| <b>CCND1</b> |
| SCARF1       |
| TPM3         |

## Supplementary Figure S1

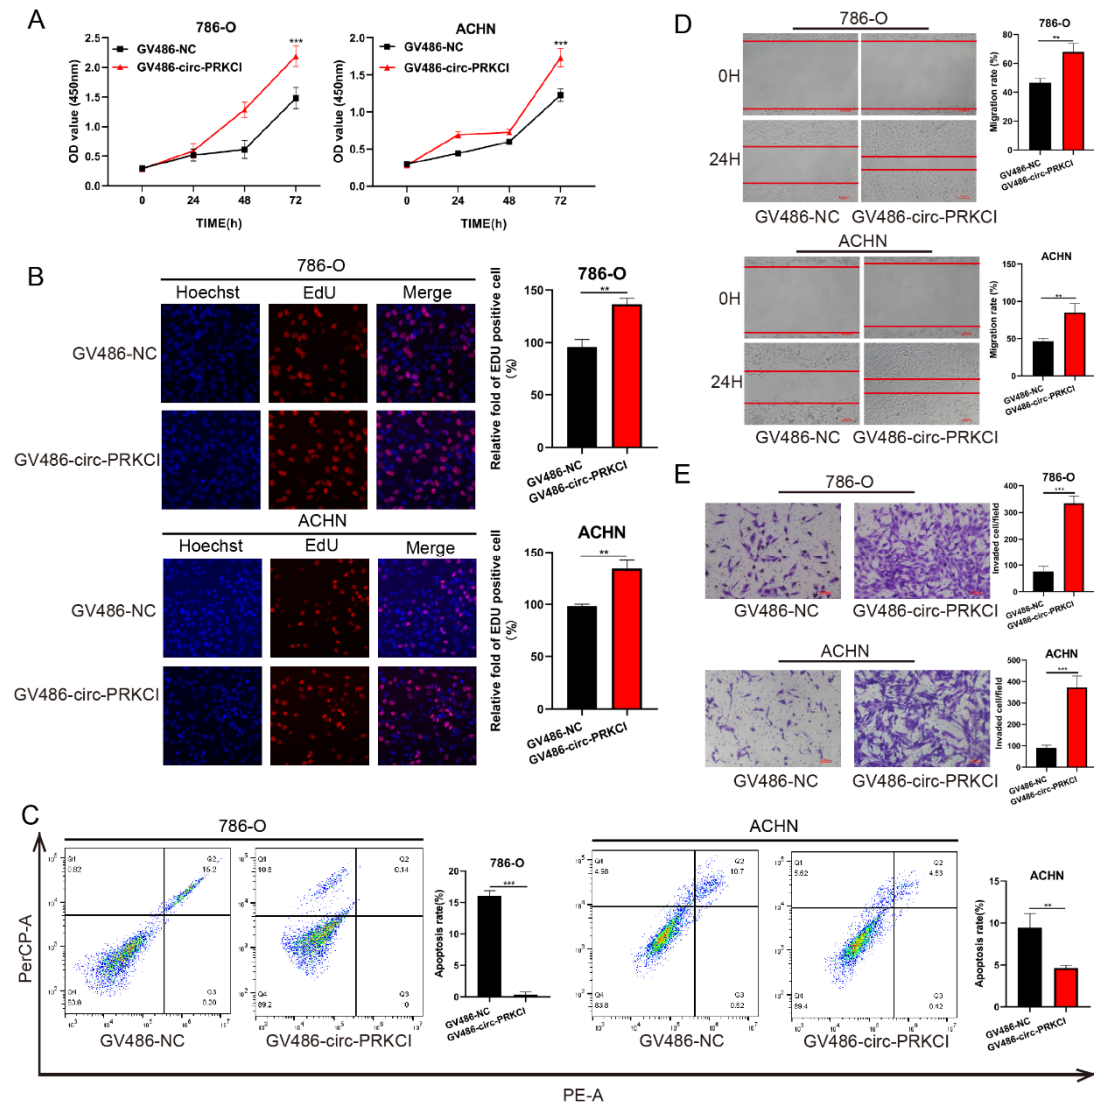

*Figure S1. Overexpression of circ-PRKCI enhanced RCC proliferation, migration, invasion, and apoptosis inhibition. (A and B) CCK-8 and EdU assays showed the cell proliferation ability was enhanced after upregulating circ-PRKCI. (C) Flow cytometry analysis indicated cell apoptosis was inhibited after transfected with GV486-circ-PRKCI. (D and E) Cell scratch and Transwell assays showed the increased migration and invasion ability of transfected RCC cells. (\*  $p < 0.05$ , \*\*  $p < 0.01$ , \*\*\*  $p < 0.001$ )*

## Supplementary Figure S2

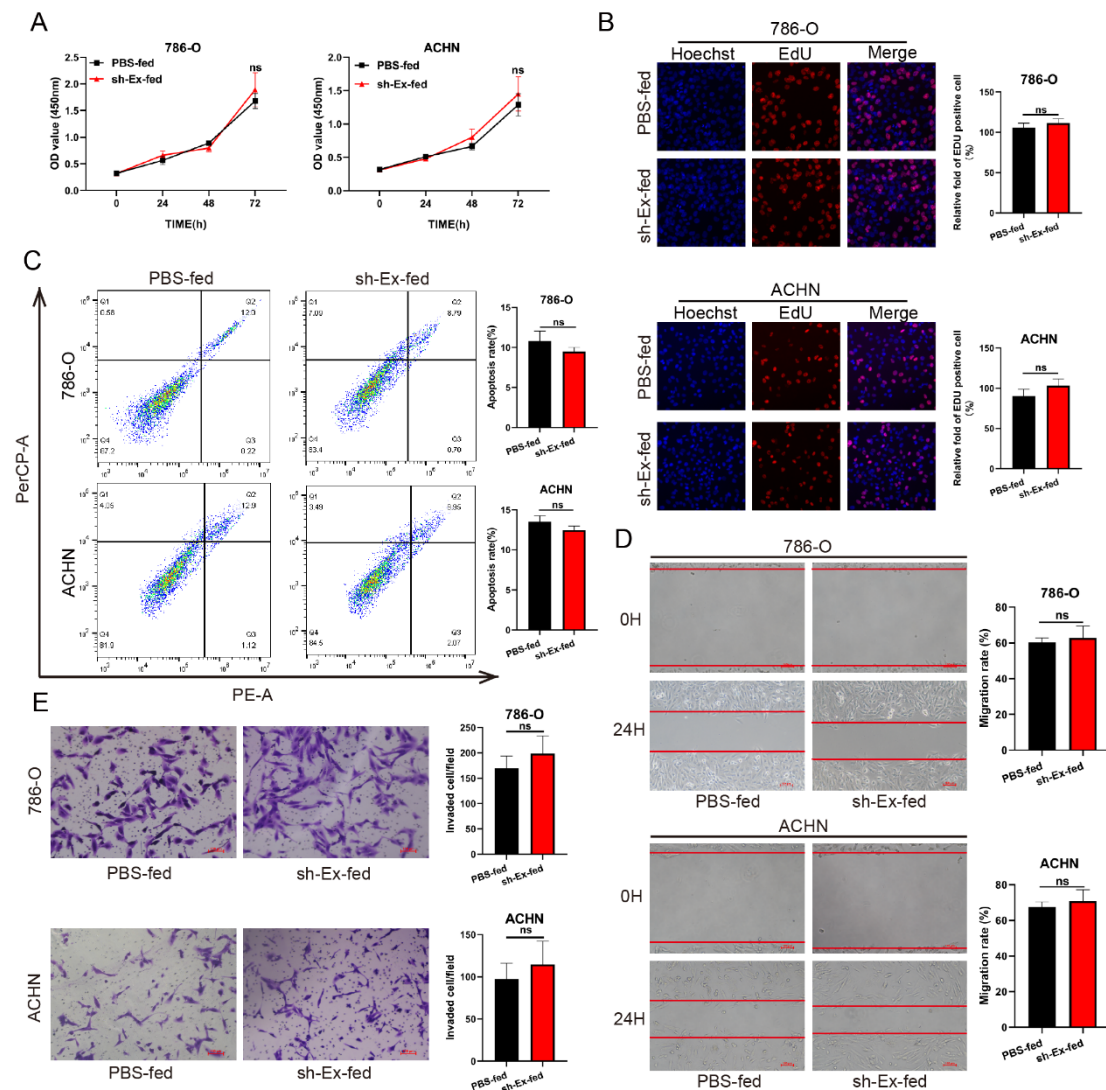

*Figure S2. Little effect of sh-Ex on RCC proliferation, apoptosis, migration and invasion. (A and B) Cell proliferation of 786-O and ACHN treated with PBS or sh-Ex was detected by CCK8 and EdU assay. (C) Cell apoptosis was detected by flow cytometry analysis. (D) Cell scratch assay for migration ability of 786-O and ACHN treated with PBS or sh-Ex. (E) Transwell assay for invasion ability of 786-O and ACHN treated with PBS or sh-Ex. (ns: no significance)*
